# Supplementary material for: Interpenetrating poly(urethane-urea)–polydimethylsiloxane networks designed as active elements in electromechanical transducers
Source: Royal Society of Chemistry journal article supplement (doi:10.1039/c6py00157b), 2016-01-01
Supplement: c6py00157b1.pdf [file c6py00157b1.pdf]

Supporting Information

**Interpenetrating Poly(urethane-urea)-Polydimethylsiloxane Networks Designed as Active Elements in Electromechanical Transducers**

By *Codrin Tugui, Stelian Vlad, Mihail Iacob, Cristian-Dragos Varganici, Lucia Pricop and Maria Cazacu*

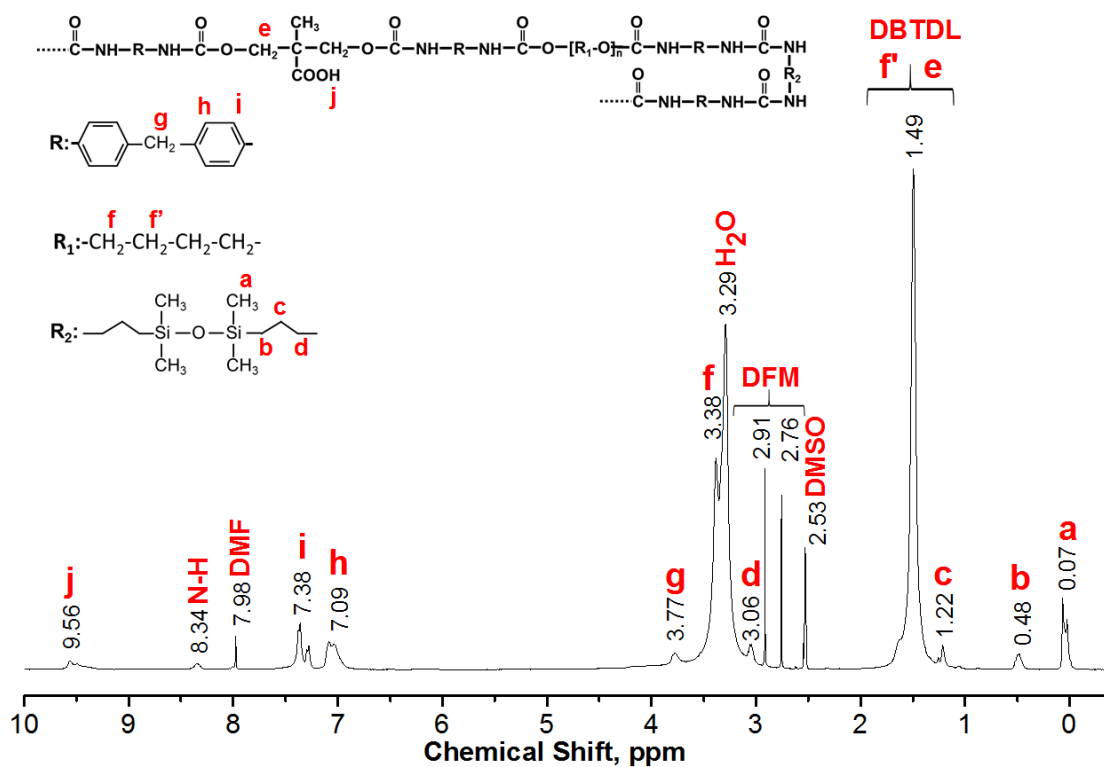

**Figure S1.** <sup>1</sup>H NMR spectrum of poly(urethane-urea-siloxane), PUUS.

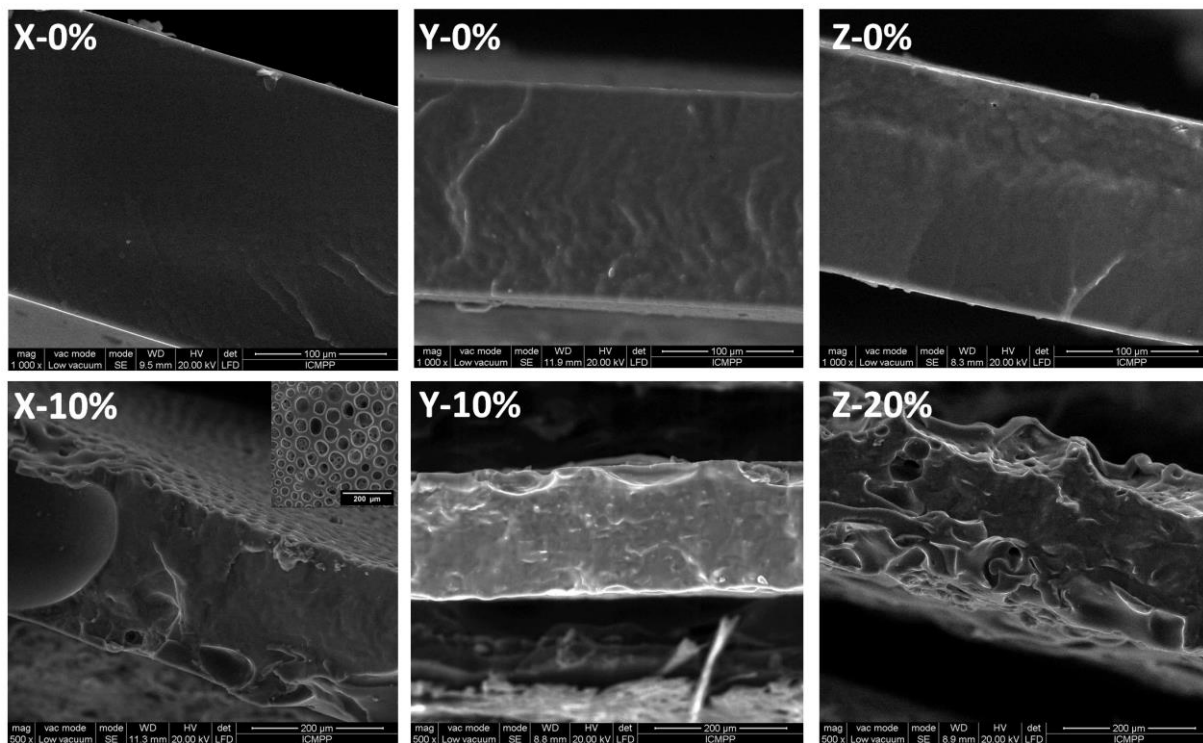

**Figure S2.** Cross-section SEM images.

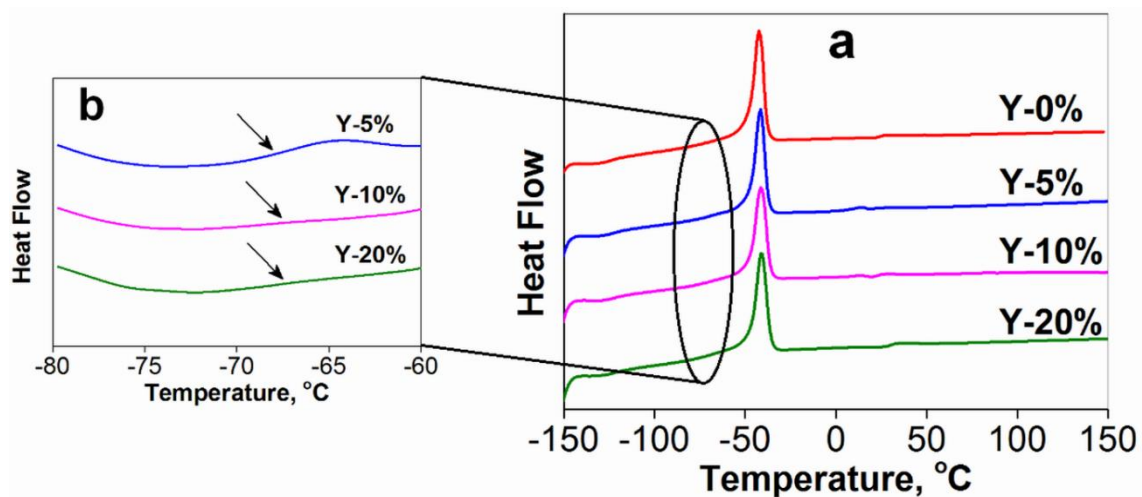

**Figure S3.** DSC curves of series Y networks (a) and corresponding Tg domains zoom (b).

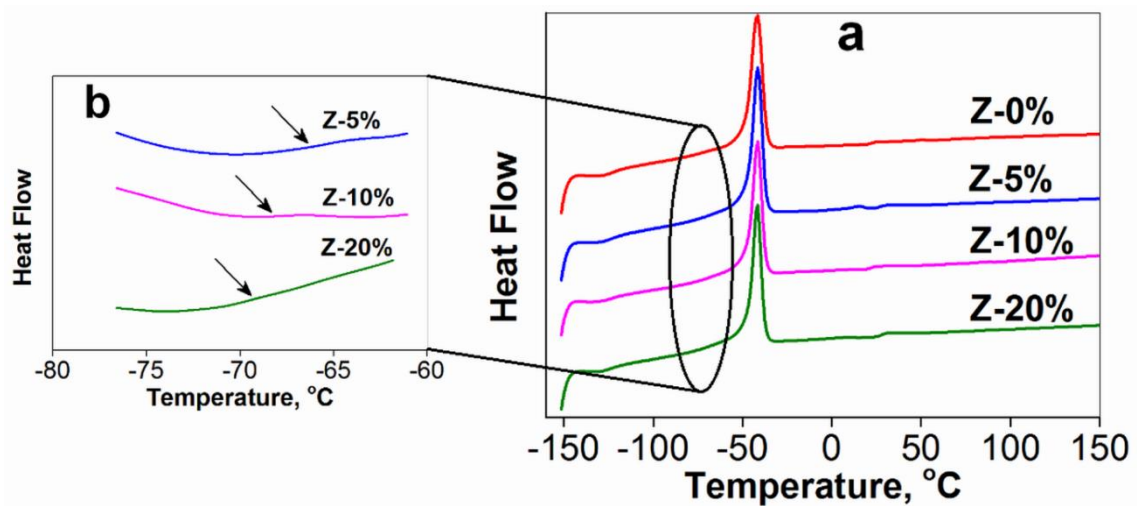

**Figure S4.** DSC curves of series Z networks (a) and corresponding Tg domains zoom (b).

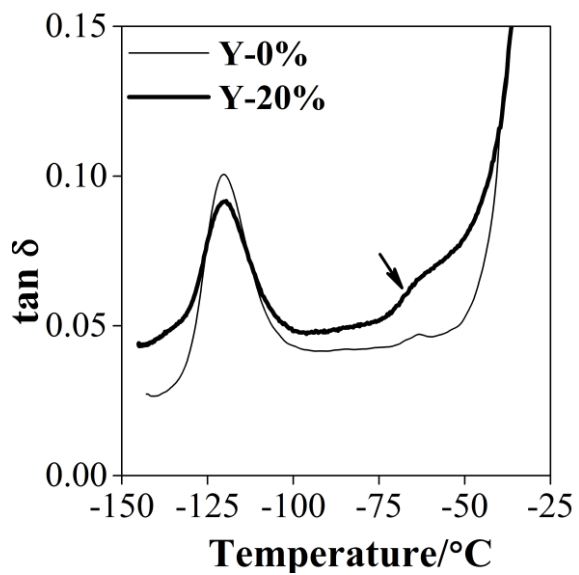

**Figure S5.** Temperature dependence of the loss factor for samples Y-0% and Y-20% at 1 Hz.

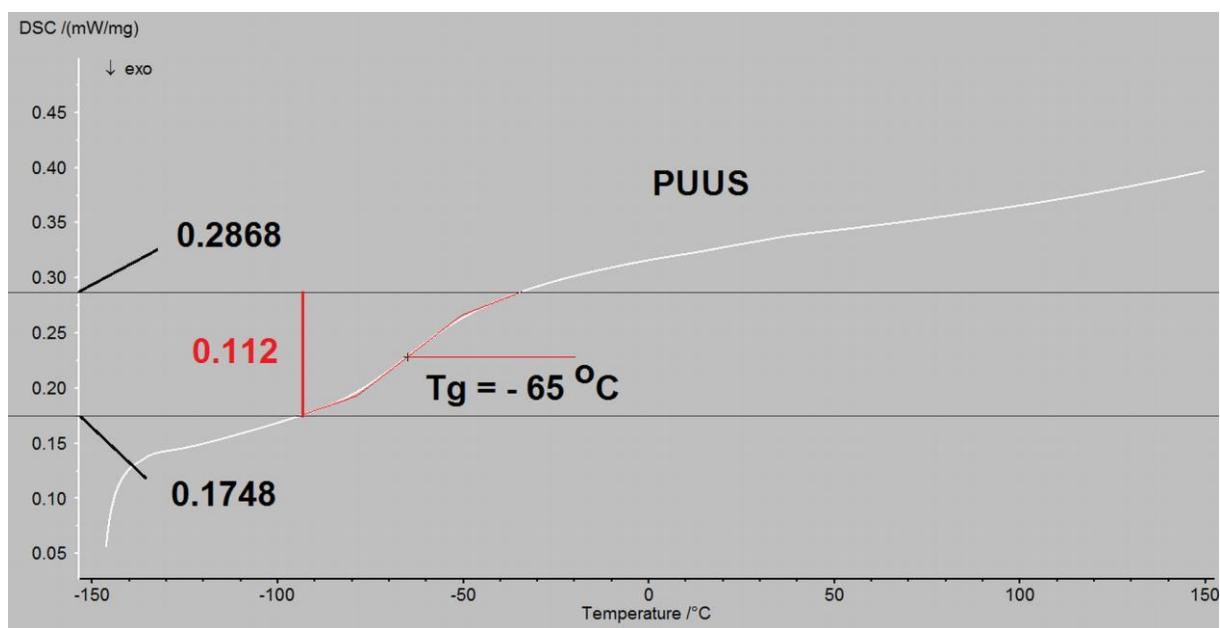

**Figure S6.** DSC curve of pure PUUS with zoomed Tg domain on heat flow axis.

**Table 1S.** The parameters estimated on the basis of water vapor sorption-desorption isotherms

| Sample | Sorption Capacity, wt% d.b. <sup>a</sup> |
|--------|------------------------------------------|
| PUUS   | 2.88                                     |
| Y-0%   | 0.65                                     |
| Y-5%   | 0.76                                     |
| Y-10%  | 0.89                                     |
| Y-20%  | 1.29                                     |

<sup>a</sup>dry basis

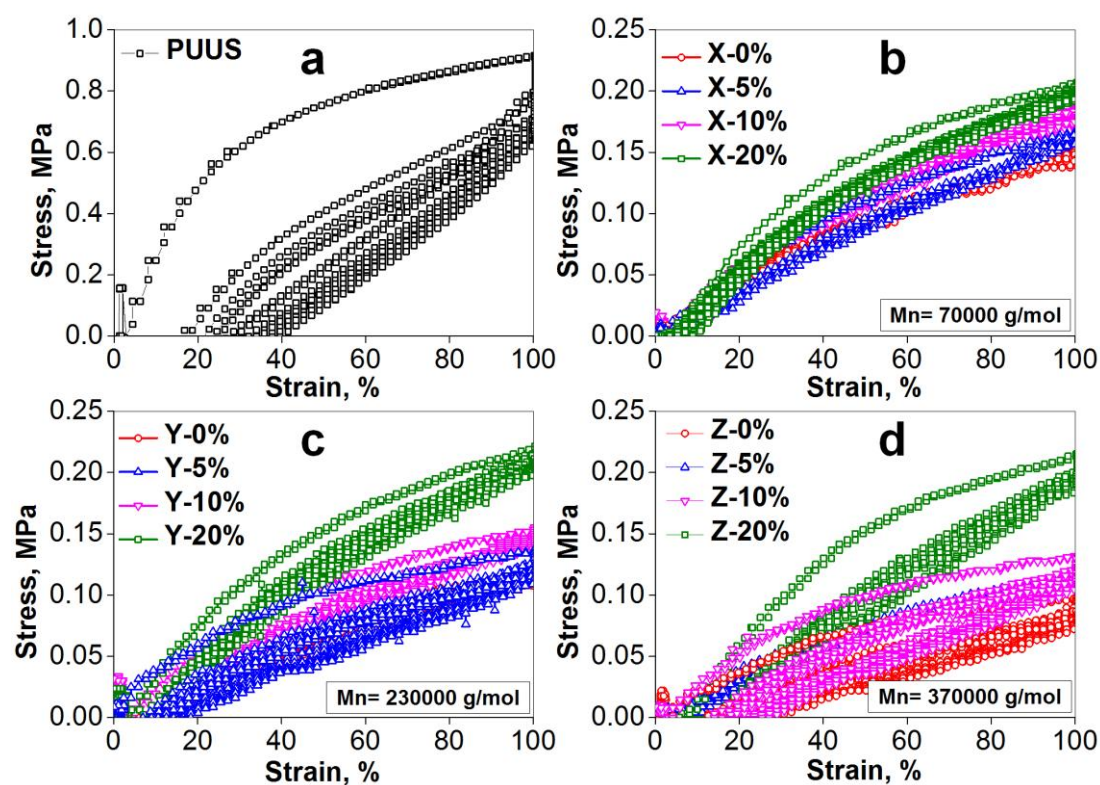

**Figure S7.** Cyclic stress-strain curves at 100% strain for: a- simple PUUS; b, c, d – the three IPN series.

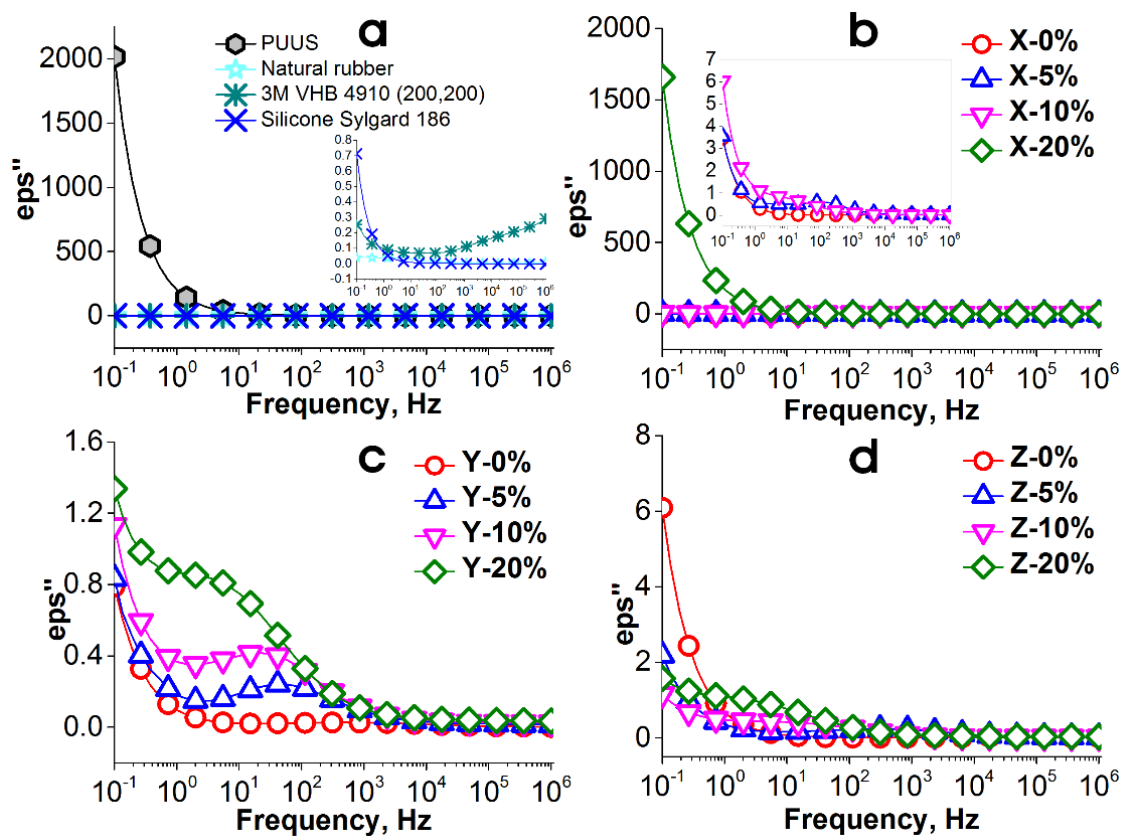

Figure S8. Dielectric loss in dependence on frequency.

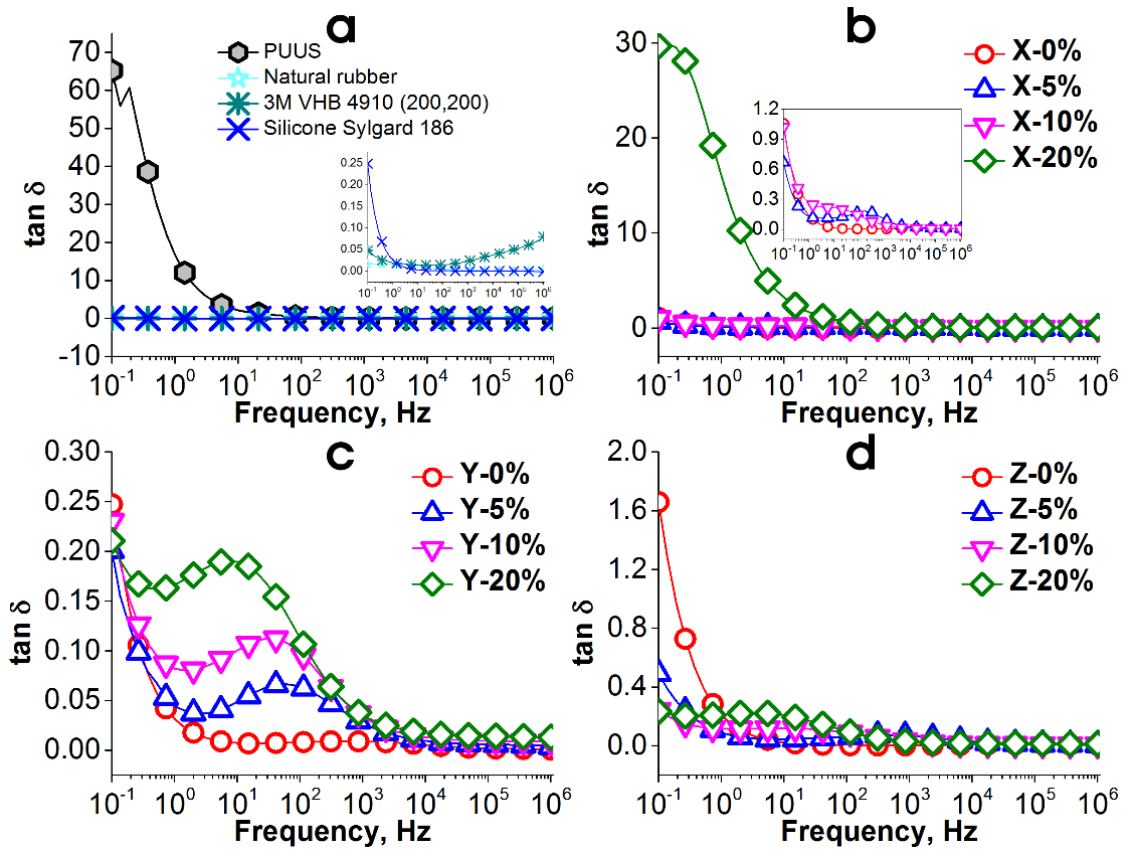

**Figure S9.** The dependence of  $\tan \delta$  ( $\tan \delta = \epsilon'' / \epsilon'$ ) on the frequency.
